# Supplementary material for: The endocytic pathway and therapeutic efficiency of doxorubicin conjugated cholesterol-derived polymers
Source: Royal Society of Chemistry journal article supplement (doi:10.1039/c4bm00224e), 2014-09-25
Supplement: c4bm00224e1.pdf [file c4bm00224e1.pdf]

ELECTRONIC SUPPLEMENTARY INFORMATION

# The Endocytic Pathway and Therapeutic Efficiency of Doxorubicin Conjugated Cholesterol-Derived Polymers

*Sema Sevimli,<sup>a,b,c</sup> Sharon Sagnella,<sup>b,c</sup> Alexander Macmillan,<sup>c</sup> Renee Whan,<sup>c</sup> Maria Kavallaris,<sup>b,c</sup> Volga Bulmus,<sup>d</sup> and Thomas P. Davis<sup>\*e,f</sup>*

<sup>a</sup>The Centre for Advanced Macromolecular Design (CAMD), The University of New South Wales,  
Sydney, New South Wales 2052, Australia

<sup>b</sup>Australian Centre for Nanomedicine (ACN), The University of New South Wales, Sydney, New  
South Wales 2052, Australia

<sup>c</sup>Children's Cancer Institute Australia (CCIA), Lowy Cancer Research Centre, The University of New  
South Wales, Sydney, New South Wales 2052, Australia

<sup>d</sup>Department of Chemical Engineering, Biotechnology and Bioengineering Graduate Program, Izmir  
Institute of Technology, Urla, Izmir 35430, Turkey

<sup>e</sup>ARC Centre of Excellence in Convergent Bio-Nano Science & Technology, Monash Institute of  
Pharmaceutical Sciences, Monash University, Parkville, Melbourne, Victoria 3052, Australia

<sup>f</sup>Department of Chemistry, University of Warwick, Coventry West Midlands CV4 7AL, United  
Kingdom

*\*Thomas.P.Davis@monash.edu*

## RESULTS

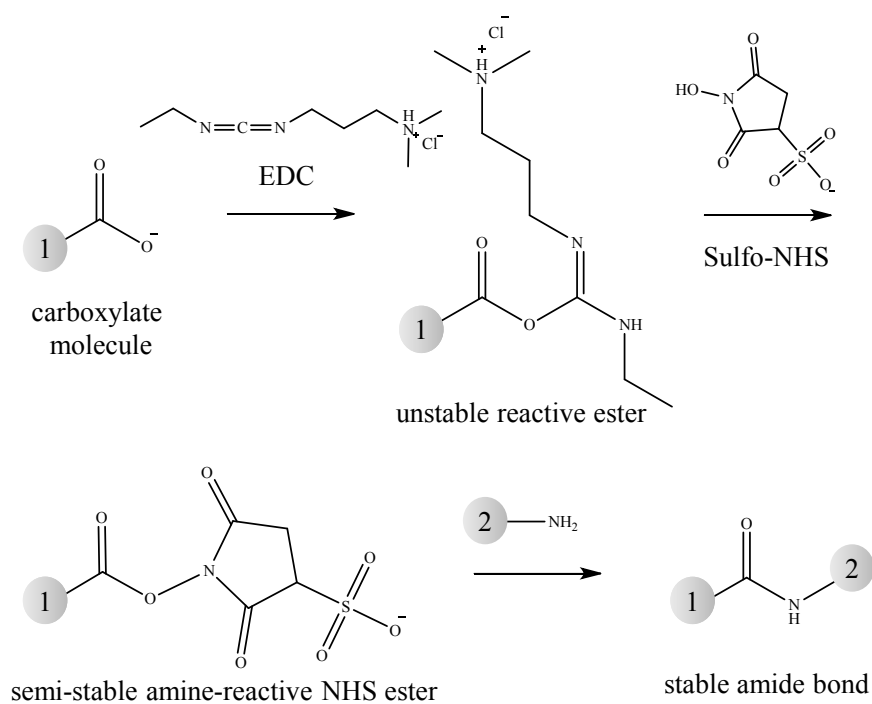

**Scheme S1:** The formation of stable amide bonds via EDC/sulfo-NHS reactions. The scheme was adapted from Hermanson.

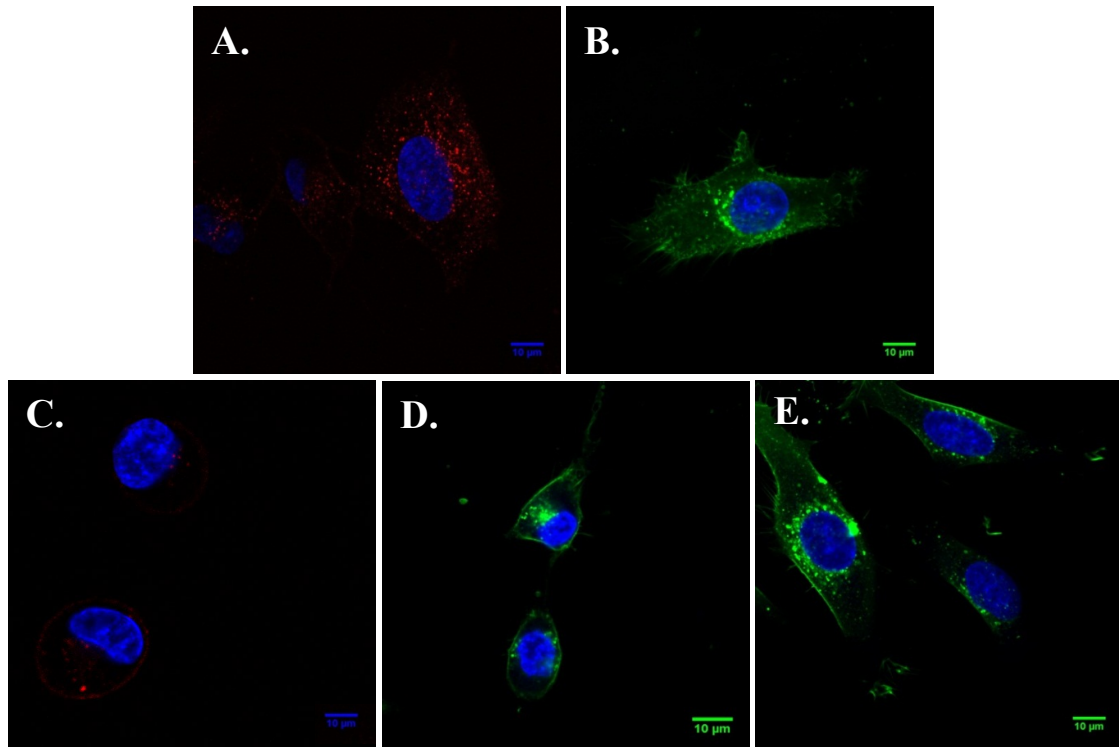

**Figure S1:** Intracellular distributions of endocytic markers in SHEP cells. Control samples consist of (A) human transferrin (16.7  $\mu\text{g/ml}$ ) and (B) lactosylceramide (0.81  $\mu\text{M}$ ) 1 hour treatments. (C) Human transferrin inhibition after 5  $\mu\text{g/ml}$  chlorpromazine treatment, lactosylceramide inhibition following a (D) 2.5 mM  $\text{M}\beta\text{CD}$  and (E) 300  $\mu\text{M}$  genistein treatments for 2 hours. Nuclei are visualized with Hoechst 33342 stain. Scale bars correspond to 10  $\mu\text{m}$ .

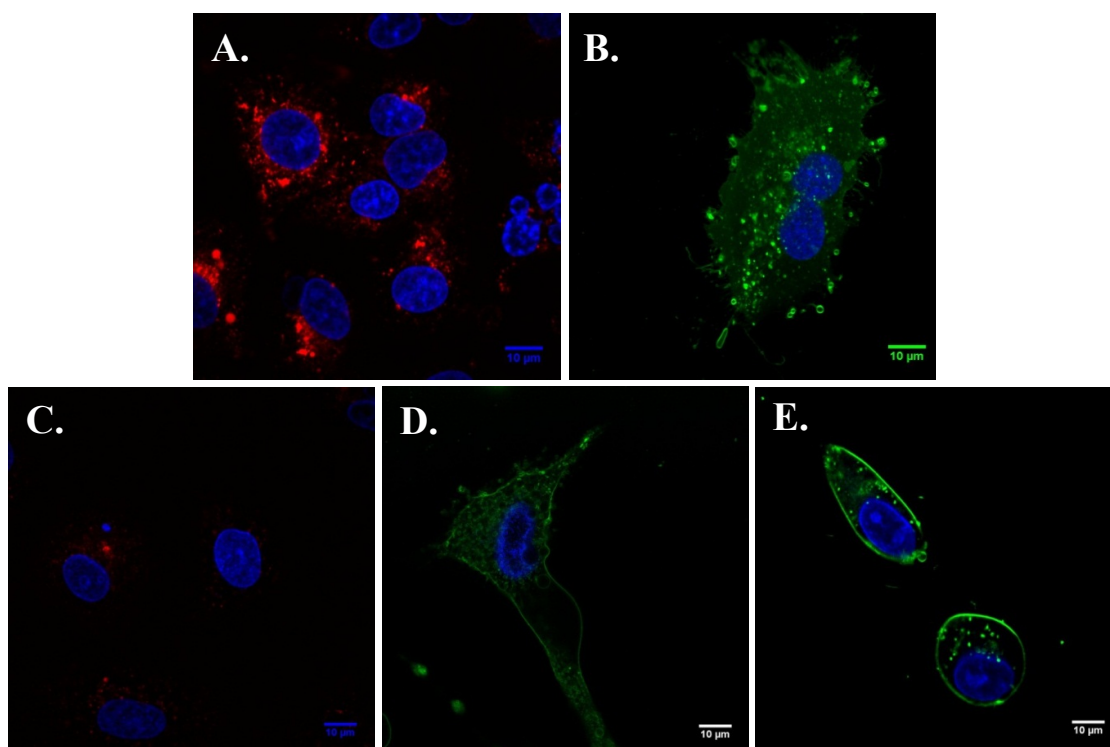

**Figure S2:** Intracellular distributions of endocytic markers in HepG2 cells. Control samples consist of (A) human transferrin (16.7 μg/ml) and (B) after 5 μg/ml chlorpromazine treatment, lactosylceramide inhibition following a (D) 2.5 mM MβCD and (E) 300 μM genistein treatments for 2 hours. Nuclei are visualized with Hoechst 33342 stain. Bars represent 10 μm.

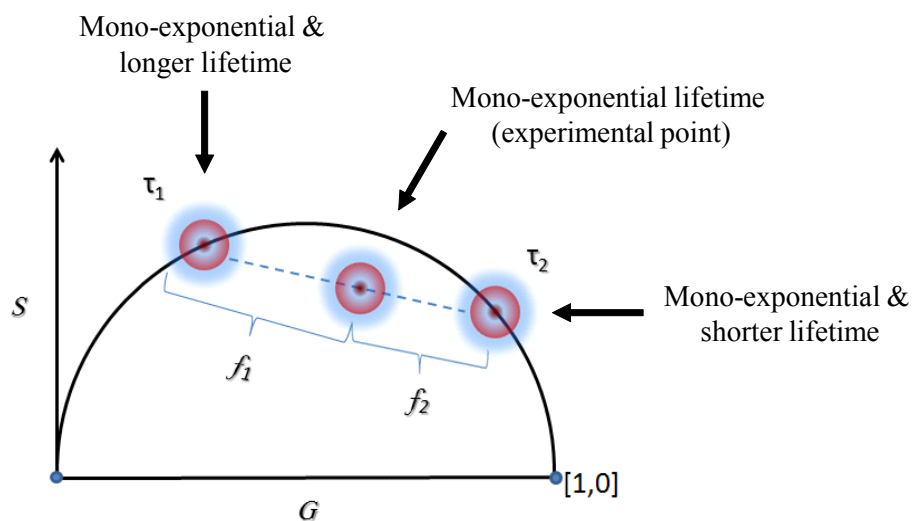

**Scheme S2:** Schematic representation of a phasor plot. All single exponential lifetimes lie on the universal circle while multi-exponential lifetimes are a linear combination of their components.

**Figure S3:** Distribution of lifetimes for P(MAA-*co*-CMA)-DOX nanocomplexes ranging from 6.25:1 to 1250:1 (w/w) ratios with in (A) 1 hour and (B) 24 hours. 1.4  $\mu$ M free DOX was included as a control sample.

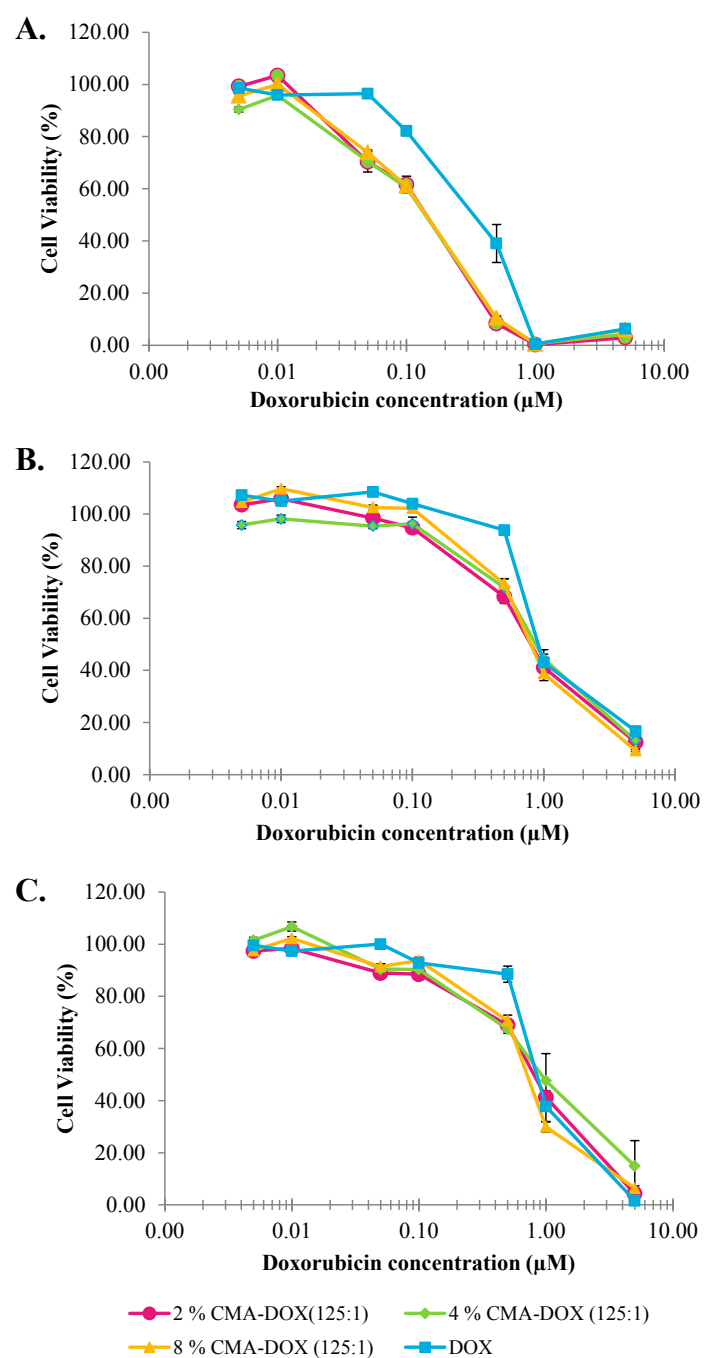

**Figure S4:** Toxicity of DOX and P(MAA-*co*-CMA)-DOX nanocomplexes prepared at 125:1 ratio in (A) SHEP (B) HepG2 (C) MRC5 cells for P(MAA-*co*-CMA) series. The assay was repeated three times in 4 replicates and the viability results were normalized according to the positive control (untreated cells). Error bars represent standard deviation.

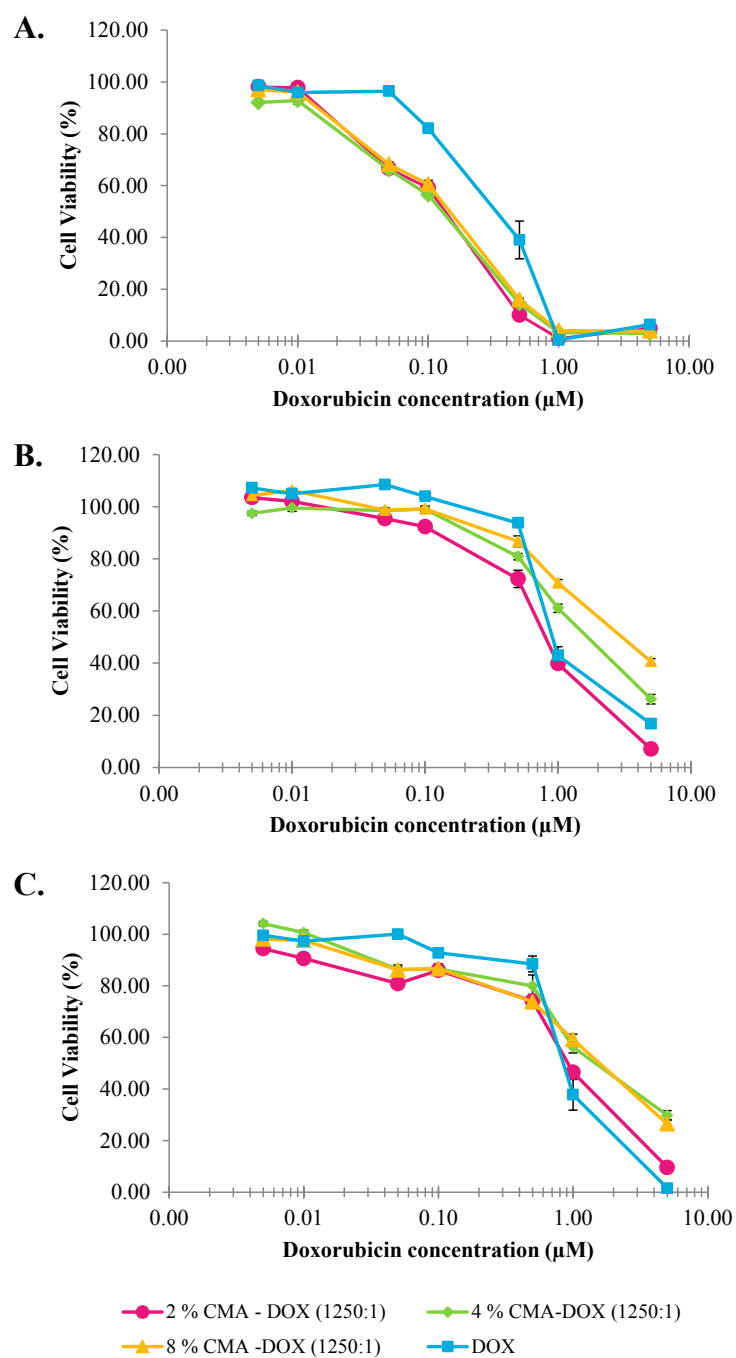

**Figure S5:** Toxicity of DOX and P(MAA-*co*-CMA)-DOX nanocomplex series at complexation ratios of 1250:1 in (A) SHEP (B) HepG2 (C) MRC5 cells, respectively. The assay was repeated three times in 4 replicates and the viability results were normalized according to the positive control (untreated cells). Error bars show standard deviation.



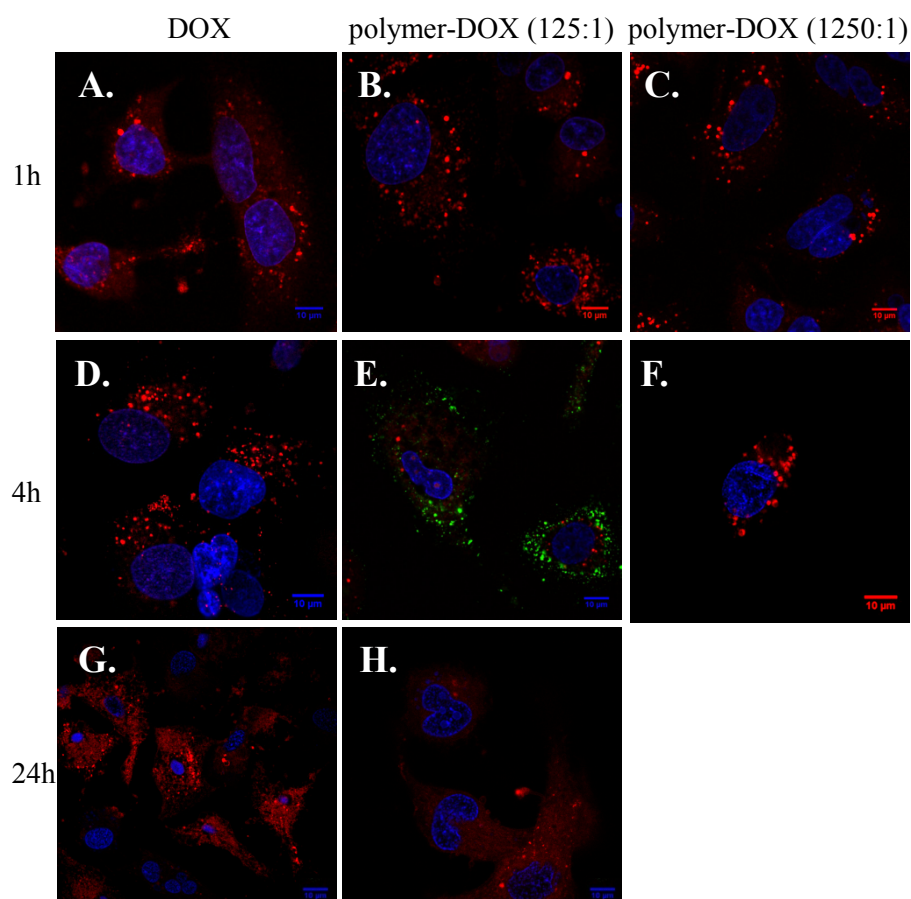

**Figure S6:** Confocal microscopy images of HepG2 cells treated with DOX (0.5  $\mu$ M) and P(MAA-*co*-CMA)-DOX nanocomplexes (125:1 and 1250:1) for (A-B-C) 1 hour, (D-E-F) 4 hours and (G-H) 24 hours. (E) Alexa Fluor 488 labelled 8 mol% CMA copolymers were utilized for preparing P(MAA-*co*-CMA)-DOX nanocomplexes at 125:1 and incubated in cells for 4 hours. Alexa Fluor 488 and DOX images were acquired at  $\lambda^{\text{ex}} = 495 \text{ nm}$  -  $\lambda^{\text{em}} = 591 \text{ nm}$  and  $\lambda^{\text{ex}} = 485 \text{ nm}$  -  $\lambda^{\text{em}} = 595 \text{ nm}$ , respectively. Nuclei were stained with Hoechst 33342. Bars represent 10  $\mu$ m.

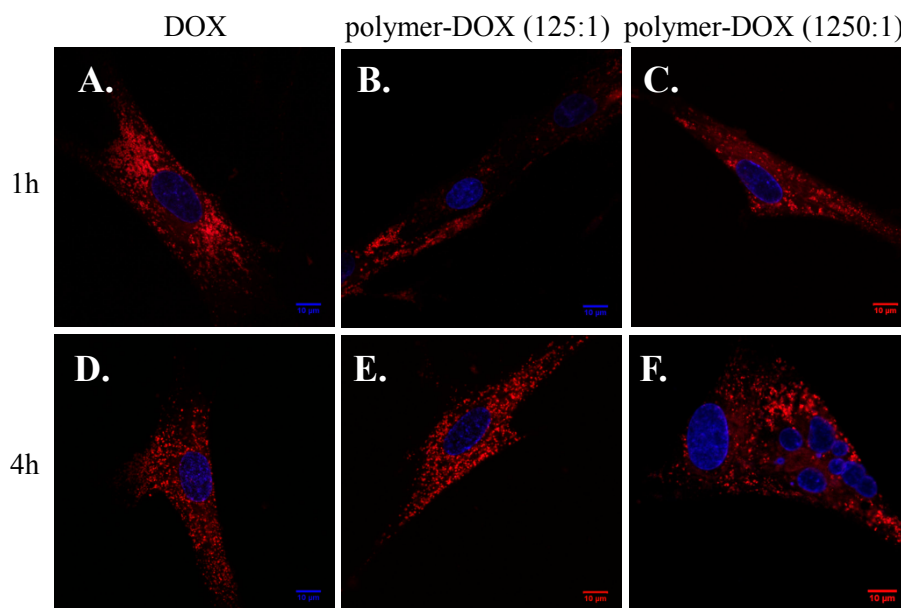

**Figure S7:** Confocal laser scanning microscopy exhibiting cellular internalization of 0.5  $\mu\text{M}$  DOX and P(MAA-*co*-CMA)-DOX nanocomplexes at conjugation ratios of 125:1 and 1250:1 within (A-B-C) 1 hour and (D-E-F) 4 hours in MRC5 cells. Nuclei (represented in blue) were visualized with Hoechst 33342 stain. DOX fluorescent images were acquired at  $\lambda^{\text{ex}} = 485 \text{ nm}$  and  $\lambda^{\text{em}} = 595 \text{ nm}$ . Scale bars indicate 10  $\mu\text{m}$ .

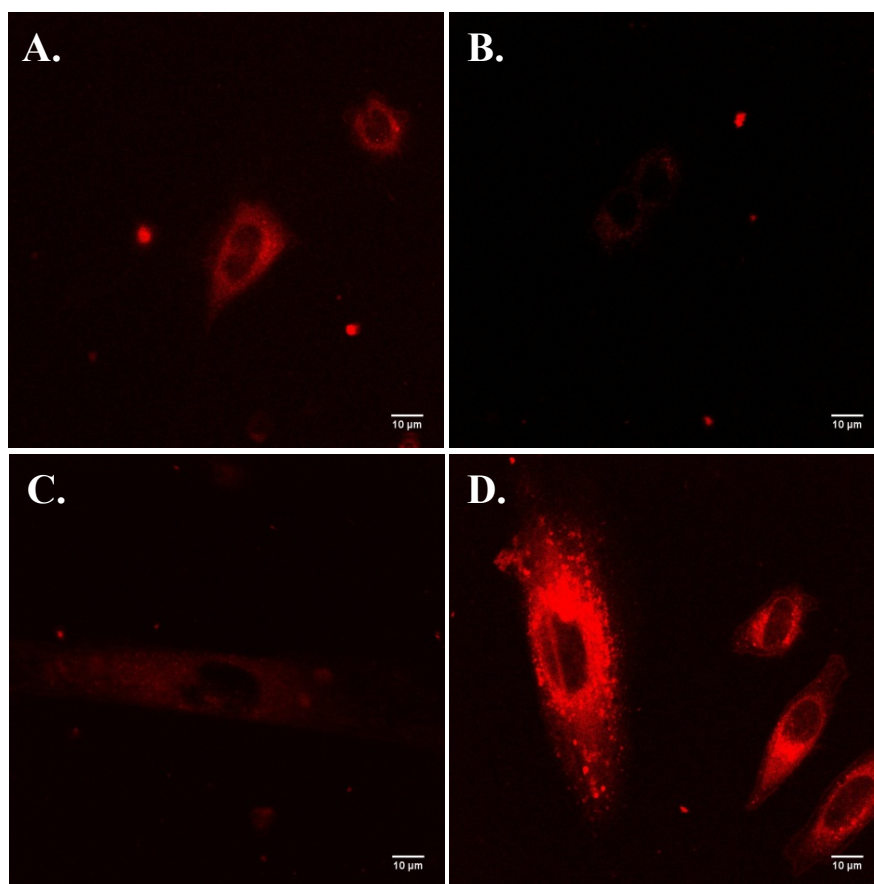

**Figure S8:** Inhibition of P(MAA-*co*-CMA)-DOX nanocomplexes after incubation with endocytic inhibitors (2 hours) in SHEP cells determined by confocal laser scanning microscopy. (A) No inhibitor, (B) genistein (300 μM), (C) chlorpromazine (5 μg/ml) and (D) MβCD (2.5 mM). Scale bars indicate 10 μm.
